# Supplementary material for: Transcriptional Reprogramming of Candida tropicalis in Response to Isoespintanol Treatment
Source: MDPI journal article supplement (doi:10.3390/jof9121199), 2023-12-15
Supplement: s1 [file jof-2738935-supplementary.pdf › jof-2738935-supplementary.pdf]

Article

# Transcriptional Reprogramming of *Candida tropicalis* in Response to Isoespintanol Treatment

Orfa Inés Contreras Martínez<sup>1\*</sup>, Alberto Angulo Ortiz<sup>2</sup>, Gilmar Santafé Patiño<sup>2</sup>, Katia Aviña-Padilla<sup>3</sup> María Camila Velasco Pareja<sup>4</sup> and María Fernanda Yasnot<sup>4</sup>

<sup>1</sup>Biology Department, Faculty of Basic Sciences, University of Córdoba, Montería 230002, Colombia

<sup>2</sup>Chemistry Department, Faculty of Basic Sciences, University of Córdoba, Montería 230002, Colombia

<sup>3</sup>Center for Research and Advanced Studies of the I.P.N Unit Irapuato, Irapuato 36821, Mexico

<sup>4</sup>Bacteriology Department, Faculty of Health Sciences, University of Córdoba, Montería 230002, Colombia

\* Correspondence: oicontreras@correo.unicordoba.edu.co

## Supplementary Materials

**Table S1.** List of real-time qPCR primers

| Genes             | Sequences                                                                                          |
|-------------------|----------------------------------------------------------------------------------------------------|
| <i>ERG6</i>       | <p>fwd: 5'-CAG.TCT.TGG.AAG.GTG.TCT.ACT.C-3'</p> <p>rev: 5'-GGT.GTT.CTT.CGT.TGG.TTT.CAT.C-3'</p>    |
| <i>KRE1</i>       | <p>fwd: 5'-GCA.GAT.GAA.ACC.ACA.TCA.TCA.TC-3'</p> <p>rev: 5'-CAT.CAG.TAC.CTG.TTA.CCC.AAA.CTA-3'</p> |
| <i>CTRG_03786</i> | <p>fwd: 5'-GGT.GGT.ACT.GAT.ACC.GTT.GTT-3'</p> <p>rev: 5'-GTG.GGT.TGG.TGT.AGG.TGA.TAG-3'</p>        |
| <i>ACTIN-1</i>    | <p>fwd: 5'-GAC.CGA.AGC.TCC.AAT.GAA.TC-3'</p> <p>rev: 5'-AAT.TGG.GAC.AAC.GTG.GGT.AA-3'</p>          |

**Table S2.** RNA extraction of *C. tropicalis*. Quality control total RNA extracted from Zoea-type larvae of *Callinectes sapidus*

| Sample Code | Purified RNA [ng/uL] | Final volume (uL) | Total purified RNA [ug] |
|-------------|----------------------|-------------------|-------------------------|
| RNAISO      | 29,51                | 27                | 0,797                   |
| RNAINO      | 32,701               | 24                | 0,785                   |

RNAISO: ISO treated Yeast; RNAINO: untreated yeast used as control

**Table S3.** NGS sequencing by RNA-seq of *C. tropicalis*

| Sample | Total reads | Clean reads % |
|--------|-------------|---------------|
| RNAISO | 40451606    | 94.9          |
| RNAINO | 26484468    | 97.6          |

**Table S4.** Mapping of transcriptomes obtained by RNA-seq

|                              | RNAISO   | RNAINO   |
|------------------------------|----------|----------|
| Number of input reads        | 19832040 | 13126552 |
| Average input read length    | 292      | 297      |
| Uniquely mapped reads number | 16219548 | 11109083 |
| Uniquely mapped reads %      | 81.78%   | 84.63%   |
| Average mapped length        | 288.70   | 294.30   |
